# Supplementary material for: Personalization strategies in digital mental health interventions: a systematic review and conceptual framework for depressive symptoms
Source: PubMed Central journal article supplement (PMC10239832; doi:10.3389/fdgth.2023.1170002), 2023-05-22
Supplement: Datasheet2.pdf [file Datasheet2.pdf]

| Meta Data                                |                                                                                                                                                                        |            |               |                               |                   |                               |             |                                     |                   | Content Variability |                              | Order Variability |                       | Guidance Variability |                              | Communication Variability |                         |
|------------------------------------------|------------------------------------------------------------------------------------------------------------------------------------------------------------------------|------------|---------------|-------------------------------|-------------------|-------------------------------|-------------|-------------------------------------|-------------------|---------------------|------------------------------|-------------------|-----------------------|----------------------|------------------------------|---------------------------|-------------------------|
| Name                                     | Papers                                                                                                                                                                 | PaperCount | Year (newest) | Type                          | Duration in weeks | Study Type                    | Sample Size | Content                             | Direct Comparison | Content variable    | Source of Variability        | Order variable    | Source of Variability | Type variable        | Source of Variability        | Communication variable    | Source of Variability   |
| Adapted version of mood                  | 10.2196/37287                                                                                                                                                          | 1          | 2022          | Unguided                      | Other             | Other                         | 55          | Other                               | Yes               | 1                   | rule-based                   | 0                 | 0                     | 1                    | rule-based                   | 0                         | 0                       |
| Adventure Self                           | 10.1016/j.invent.2017.04.001                                                                                                                                           | 1          | 2017          | Blended                       | 10                | RCT                           | 23          | Group Intervention                  | No                | 0                   | 0                            | 0                 | 0                     | 0                    | 0                            | 0                         | 0                       |
| AirHeart                                 | 10.2196/39516                                                                                                                                                          | 1          | 2022          | Unguided                      | 2                 | RCT                           | 94          | Module-based.                       | No                | 0                   | 0                            | 0                 | 0                     | 0                    | 0                            | 1                         | user choice             |
| Aptivate! / Moodivate                    | 10.1016/j.jad.2019.03.009<br>10.1016/j.beth.2018.12.003                                                                                                                | 2          | 2019          | Unguided                      | 8                 | RCT/Feasibility               | 46          | Behavioural Activation Intervention | No                | 0                   | 0                            | 0                 | 0                     | 0                    | 0                            | 0                         | 0                       |
| ASCENSO                                  | 10.2196/26814                                                                                                                                                          | 1          | 2021          | Blended                       | 36                | RCT                           | 84          | Other                               | No                | 0                   | 0                            | 0                 | 0                     | 1                    | rule-based, user choice      | 1                         | rule-based              |
| Be Good to Yourself                      | 10.1016/j.psychres.2018.08.113                                                                                                                                         | 1          | 2018          | Unguided                      | 4                 | RCT                           | 45          | 40 Single Exercises                 | No                | 1                   | user choice                  | 0                 | 0                     | 0                    | 0                            | 1                         | user choice             |
| Beating the Blues                        | 10.1016/j.beth.2017.04.004, 10.1176/appi.ps.201900283, 10.1093/ofid/ofaa280, 10.2196/27630, 10.3310/hta191010                                                          | 5          | 2020          | Guided                        | 8/12              | RCT/ RCT/ Usability Testing   | 485         | Module-based.                       | No                | 1                   | user choice                  | 0                 | 0                     | 1                    | user choice, provider choice | 0                         | 0                       |
| BlueWatch                                | 10.2196/mental.9445                                                                                                                                                    | 1          | 2018          | Unguided                      | 6                 | RCT                           | 5           | Module-based.                       | No                | 0                   | 0                            | 0                 | 0                     | 0                    | 0                            | 0                         | 0                       |
| Boost Me                                 | 10.1037/ser0000261                                                                                                                                                     | 1          | 2019          | Guided                        | 6                 | RCT                           | 10          | Behavioural Activation Intervention | No                | 0                   | 0                            | 0                 | 0                     | 0                    | 0                            | 0                         | 0                       |
| CBM Intervention                         | 10.1016/j.jad.2015.02.026, 10.1177/2167702614560746, 10.1016/j.brat.2016.07.008                                                                                        | 3          | 2016          | Unguided                      | 1/4               | RCT                           | 136         | CBM                                 | No                | 0                   | 0                            | 0                 | 0                     | 1                    | rule-based                   | 0                         | 0                       |
| CBT MobileWork                           | 10.1007/s10608-020-10159-4                                                                                                                                             | 1          | 2020          | Blended                       | Other             | Pre-Post                      | 23          | homework assg.                      | No                | 1                   | rule-based                   | 0                 | 0                     | 1                    | rule-base                    | 0                         | 0                       |
| CBT-M                                    | 10.2196/24380                                                                                                                                                          | 1          | 2021          | Guided                        | 25                | RCT                           | 22          | Module-based.                       | No                | 0                   | 0                            | 0                 | 0                     | 0                    | 0                            | 0                         | 0                       |
| Depressioncoach (form Depressionshjälpen | 10.1159/000481515<br>10.1080/02813432.2017.1333299                                                                                                                     | 1          | 2020          | Guided                        | 6                 | RCT (no control)              | 1089        | Module-based                        | No                | 0                   | 0                            | 0                 | 0                     | 0                    | 0                            | 0                         | 0                       |
| Deprexis                                 | 10.1037/ccp0000171, 10.1159/000481177, 10.1055/a-1826-2888, 10.1159/000445355, 10.1186/s13561-020-00273-0, 10.1016/j.invent.2014.12.003, 10.1016/S2215-0366(14)00049-2 | 7          | 2022          | Guided                        | 12                | RCT                           | 2964        | Module-based.                       | No                | 1                   | rule-based                   | 1                 | rule-based            | 1                    | rule-based                   | 1                         | rule-based              |
| e-couch                                  | 10.2196/mental.4356                                                                                                                                                    | 1          | 2016          | Unguided                      | 12                | Pre-Post                      | 298         | Other                               | No                | 0                   | 0                            | 0                 | 0                     | 0                    | 0                            | 0                         | 0                       |
| EFMT                                     | 10.1038/s41746-018-0025-5, 10.1177/2470547019877880                                                                                                                    | 2          | 2019          | Unguided                      | 6                 | RCT                           | 42          | EFMT                                | No                | 1                   | rule-based                   | 0                 | 0                     | 0                    | 0                            | 0                         | 0                       |
| EmoRecorder                              | 10.4108/earl.14-10-2015.2261655                                                                                                                                        | 1          | 2015          | Unguided                      | 2                 | Other                         | 15          | RecommenderSys                      | No                | 1                   | ML model                     | 0                 | 0                     | 0                    | 0                            | 0                         | 0                       |
| eSMART-MH                                | 10.1111/ppc.12112                                                                                                                                                      | 1          | 2015          | Guided                        | 12                | RCT                           | 30          | VR                                  | No                | 0                   | 0                            | 0                 | 0                     | 0                    | 0                            | 0                         | 0                       |
| GAF-ID                                   | 10.1016/S2215-0366(18)30223-2                                                                                                                                          | 1          | 2018          | Guided                        | 8                 | RCT                           | 159         | Module-based.                       | No                | 0                   | 0                            | 0                 | 0                     | 0                    | 0                            | 1                         | user choice             |
| GET.ON Mood Enhanc                       | 10.1159/000438673 10.1016/j.jad.2018.12.065 10.1016/j.beth.2017.05.004 10.1016/j.invent.2021.100455                                                                    | 4          | 2021          | Guided                        | 6                 | RCT                           | 550         | Module-based.                       | No                | 1                   | user choice, provider choice | 0                 | 0                     | 0                    | 0                            | 1                         | user choice, rule-based |
| GIAI                                     | 10.1097/MD.000000000018774                                                                                                                                             | 1          | 2020          | Guided                        | 10                | RCT                           | 96          | Unclear                             | No                | 1                   | provider choice              | 0                 | 0                     | 1                    | user choice                  | 0                         | 0                       |
| Good Days Ahead                          | 10.1176/appi.ajp.2017.17010089, 10.1001/jamanetworkopen.2021.46716                                                                                                     | 2          | 2022          | Guided                        | 12/16             | RCT                           | 172         | Module-based.                       | No                | 0                   | 0                            | 0                 | 0                     | 0                    | 0                            | 1                         | user choice             |
| HeadGear                                 | 10.2196/11661                                                                                                                                                          | 1          | 2018          | Unguided                      | 4                 | PrototypeTestin g/Feasibility | 105         | Single Tasks, BA & Meditation       | No                | 0                   | 0                            | 0                 | 0                     | 0                    | 0                            | 0                         | 0                       |
| Headspace                                | 10.1016/j.invent.2021.100413, 10.1177/1046878119851821                                                                                                                 | 2          | 2021          | Guided/Unguide d              | 2                 | RCT, PrePost                  | 89          | Meditation                          | No                | 0                   | 0                            | 0                 | 0                     | 0                    | 0                            | 0                         | 0                       |
| Healthy Psychological                    | 10.1017/S0033291722000599                                                                                                                                              | 1          | 2022          | Guided                        | 5                 | RCT                           | 110         | module-based.                       | No                | 0                   | 0                            | 0                 | 0                     | 0                    | 0                            | 0                         | 0                       |
| Help4Mood                                | 10.1177/1357633X15609793                                                                                                                                               | 1          | 2016          | Blended                       | 4                 | RCT                           | 13          | Other                               | No                | 1                   | rule-based,user choice       | 0                 | 0                     | 0                    | 0                            | 1                         | rule-based              |
| HelpID                                   | 10.2196/jmir.6546                                                                                                                                                      | 1          | 2017          | Guided                        | 12                | RCT                           | 90          | Other                               | No                | 0                   | 0                            | 0                 | 0                     | 1                    | user choice                  | 0                         | 0                       |
| Hermes                                   | 10.1016/j.brat.2022.104070                                                                                                                                             | 1          | 2022          | Guided/Unguide d              | 8                 | RCT                           | 316         | Other                               | No                | 0                   | 0                            | 0                 | 0                     | 1                    | rule-based                   | 0                         | 0                       |
| HLP                                      | 10.2196/15845                                                                                                                                                          | 1          | 2020          | Blended                       | 4-8               | RCT                           | 54          | Module-based                        | No                | 0                   | 0                            | 0                 | 0                     | 0                    | 0                            | 1                         | rule-based              |
| IACT china                               | 10.1002/jcjp.23329                                                                                                                                                     | 1          | 2021          | Unguided                      | 6                 | RCT                           | 95          | Module-based                        | No                | 0                   | 0                            | 0                 | 0                     | 0                    | 0                            | 1                         | rule-based              |
| iFightDepression                         | 10.1016/j.invent.2021.100476, 10.1177/1357633X221084584, 10.1016/j.invent.2022.100551, 10.2196/28321                                                                   | 4          | 2022          | Guided/Unguide d              | 6                 | Routine Care Data, RCT        | 2640        | Module-based                        | No                | 0                   | 0                            | 0                 | 0                     | 0                    | 0                            | 0                         | 0                       |
| IMI eSano BackCare-I                     | 10.1016/j.jad.2022.04.004                                                                                                                                              | 1          | 2022          | Guided                        | 9                 | RCT                           | 105         | Module-based                        | No                | 1                   | user choice                  | 0                 | 0                     | 0                    | 0                            | 0                         | 0                       |
| ImproveyourMood plus                     | 10.1016/j.jad.2021.05.021                                                                                                                                              | 1          | 2021          | Unguided                      | 3                 | RCT                           | 122         | JIT                                 | Yes               | 0                   | 0                            | 0                 | 0                     | 0                    | 0                            | 1                         | rule-based              |
| IP Stockholm                             | 10.1371/journal.pone.0161191                                                                                                                                           | 1          | 2016          | Guided                        | 9                 | Routine Care Data             | 1738        | Module-based                        | No                | 0                   | 0                            | 0                 | 0                     | 0                    | 0                            | 0                         | 0                       |
| iPST                                     | 10.1136/bmjinnov-2015-000098, 10.2196/10130                                                                                                                            | 2          | 2018          | Unguided                      | 12                | RCT                           | 323         | Other                               | No                | 1                   | rule-based                   | 0                 | 0                     | 0                    | 0                            | 0                         | 0                       |
| Lifestyle Hub                            | 10.1037/ccp0000695                                                                                                                                                     | 1          | 2021          | Unguided                      | 8                 | RCT                           | 39          | Module-based                        | No                | 0                   | 0                            | 0                 | 0                     | 0                    | 0                            | 1                         | user choice             |
| Living Life to the full In               | 10.1016/S2215-0366(16)00083-3                                                                                                                                          | 1          | 2016          | Blended                       | 12                | RCT                           | 307         | Module-based                        | No                | 0                   | 0                            | 0                 | 0                     | 0                    | 0                            | 0                         | 0                       |
| Living to the full                       | 10.1192/bjp.bp.114.146068, 10.1016/j.brat.2015.06.014                                                                                                                  | 2          | 2016          | Guided                        | 9-12              | RCT                           | 321         | Module-based                        | No                | 0                   | 0                            | 0                 | 0                     | 0                    | 0                            | 1                         | user choice, rule-based |
| makora AG                                | 10.3389/fgth.2020.00004                                                                                                                                                | 1          | 2020          | Unguided                      | 12                | RCT (with vs.                 | 168         | Module-based                        | No                | 0                   | 0                            | 0                 | 0                     | 0                    | 0                            | 1                         | rule-based              |
| Marigold                                 | 10.1016/j.jad.2019.07.049, 10.2196/25922                                                                                                                               | 2          | 2021          | Guided/Unguide d (Trial Arms) | 5                 | RCT, Prepost                  | 644         | Other                               | No                | 0                   | 0                            | 0                 | 0                     | 0                    | 0                            | 1                         | rule-based              |
| MBM                                      | 10.1007/s10608-019-10042-x                                                                                                                                             | 1          | 2020          | Unguided                      | 0.5               | RCT (no control)              | 153         | Memory Bias Modification            | No                | 0                   | 0                            | 0                 | 0                     | 0                    | 0                            | 0                         | 0                       |
| MCT & More                               | 10.2196/26498                                                                                                                                                          | 1          | 2021          | Unguided                      | 4                 | RCT                           | 200         | Single Exercises                    | No                | 1                   | user choice                  | 0                 | 0                     | 0                    | 0                            | 0                         | 0                       |

| Meta Data               |                                                                                                                                                                   |            |               |                  |                   |                                             |             |                                  |                   | Content Variability |                              | Order Variability |                       | Guidance Variability         |                              | Communication Variability                 |                           |
|-------------------------|-------------------------------------------------------------------------------------------------------------------------------------------------------------------|------------|---------------|------------------|-------------------|---------------------------------------------|-------------|----------------------------------|-------------------|---------------------|------------------------------|-------------------|-----------------------|------------------------------|------------------------------|-------------------------------------------|---------------------------|
| Name                    | Papers                                                                                                                                                            | PaperCount | Year (newest) | Type             | Duration in weeks | Study Type                                  | Sample Size | Content                          | Direct Comparison | Content variable    | Source of Variability        | Order variable    | Source of Variability | Type variable                | Source of Variability        | Communication variable                    | Source of Variability     |
| mentalis phoenix        | 10.2196/16643, 10.1186/s40814-021-00799-y<br>10.1016/j.jad.2021.02.007, 10.1007/s10484-020-09458-z, 10.2196/25808, 10.1016/j.invent.2021.100408                   | 2          | 2021          | Unguided/Blended |                   | 2 RCT                                       | 48          | Other                            | No                | 0                   |                              | 0                 |                       | 0                            |                              | 0                                         |                           |
| Meru Health             | 10.2196/mhealth.5960                                                                                                                                              | 4          | 2021          | Guided           |                   | 8 RCT/Pre post                              | 349         | Module-based                     | No                | 0                   |                              | 0                 |                       | 0                            |                              | 0                                         |                           |
| Mobile Sensing and MOOD | 10.2196/14240                                                                                                                                                     | 1          | 2016          | Unguided         |                   | 2 Feasibility                               | 126         | Other                            | No                | 1                   | ML model                     |                   |                       | 0                            |                              | 0                                         |                           |
|                         |                                                                                                                                                                   | 1          | 2019          | Unguided         |                   | 6 RCT                                       | 64          | Module-based                     | No                | 0                   |                              | 1                 | user choice           |                              | 0                            |                                           | 1 rule-based              |
| MoodBuster              | 10.1159/000503408<br>10.1016/j.ajp.2017.11.007, 10.3310/hta20890, 10.3389/psyt.2017.00032, 10.1177/2043808719842502, 10.1136/bmj.h5627, 10.1016/j.jad.2018.06.008 | 1          | 2019          | Blended          |                   | 13 Case Report                              | 1           | Module-based (lessons)           | No                | 1                   | user choice, provider choice |                   | 1                     | user choice, provider choice | 1                            | rule-based, user choice - provider choice | 0                         |
| Moodgym                 | 10.2196/mhealth.4231                                                                                                                                              | 6          | 2019          | Guided/Unguided  | 4 - 12 - 6        | RCT                                         | 1524        | Module-based                     | No                | 0                   |                              | 0                 |                       | 1                            | user choice, provider choice |                                           | 0                         |
| MoodHacker              | 10.1016/j.jad.2021.05.021                                                                                                                                         | 1          | 2021          | Unguided         |                   | 6 RCT                                       | 150         | Other                            | No                | 0                   |                              | 0                 |                       | 0                            |                              | 0                                         |                           |
| MoodTracker             | 10.1145/3329189.3329214                                                                                                                                           | 1          | 2021          | Unguided         |                   | 3 RCT                                       | 58          | Mood Monitoring                  | No                | 0                   |                              | 0                 |                       | 0                            |                              | 0                                         |                           |
| MORIBUS                 | 10.2196/15845                                                                                                                                                     | 1          | 2019          | blended          |                   | 4 Feasibility                               | 7           | Other                            | No                | 0                   |                              | 0                 |                       | 0                            |                              | 0                                         |                           |
| MP                      | 10.1145/3313831.3376879                                                                                                                                           | 1          | 2020          | Unguided         |                   | 4-8 RCT                                     | 54          | module-based                     | No                | 0                   |                              | 0                 |                       | 0                            |                              | 1                                         | rule-based                |
| MUBS                    | 10.2196/24871                                                                                                                                                     | 1          | 2020          | Unguided         |                   | 8 Feasibility                               | 17          | RecommenderSys                   | No                | 1                   | user choice, ML model        |                   | 0                     |                              | 0                            |                                           | 0                         |
| My Food & Mood          | 10.2196/resprot.7203                                                                                                                                              | 1          | 2021          | Unguided         |                   | 8 Cohort Study                              | 614         | Other                            | No                | 0                   |                              | 0                 |                       | 0                            |                              | 0                                         |                           |
| myStrength              | 10.2196/15845                                                                                                                                                     | 1          | 2017          | Unguided         |                   | 26 RCT                                      | 78          | Other                            | No                | 1                   | patient choice               |                   | 0                     |                              | 0                            |                                           | 0                         |
| PAPP (before: ITAU)     | 10.1145/3313831.3376510                                                                                                                                           | 1          | 2020          | Blended          |                   | 4-8 RCT                                     | 56          | Module-based                     | No                | 0                   |                              | 0                 |                       | 0                            |                              | 1                                         | rule-based                |
| Platform                | 10.1002/da.22624                                                                                                                                                  | 1          | 2020          | blended          | Unclear           | Cohort Study                                | 17          | Other                            | No                | 1                   | provider choice              |                   | 0                     |                              | 0                            |                                           | 0                         |
| PRIME-D                 | 10.3390/bs8040036                                                                                                                                                 | 1          | 2017          | Guided           |                   | 8 Cohort Study                              | 36          | Other                            | No                | 0                   |                              | 0                 |                       | 1                            | provider choice, user choice |                                           | 0                         |
| Push-D                  | 10.1136/ebmental-2022-300455                                                                                                                                      | 1          | 2018          | Guided           |                   | 10 Cohort Study                             | 78          | Module-based                     | No                | 1                   | user choice, rule based      |                   | 0                     |                              | 0                            |                                           | 1 rule based              |
| Resilience Training     | 10.1177/20552076221091353                                                                                                                                         | 1          | 2018          | Unguided         |                   | 8 RCT (no control)                          | 1093        | Other                            | No                | 0                   |                              | 0                 |                       | 0                            |                              | 1                                         | rule-based                |
| Self-administered Psy   | 10.1177/20552076221091353                                                                                                                                         | 1          | 2022          | Unguided         | Unclear           | Feasibility (prepost)                       | 110         | Unclear                          | No                | 1                   | rule-based, user choice      |                   | 0                     |                              | 0                            |                                           | 1 rule-based              |
| Smiling is Fun          | 10.2196/jmir.5695, 10.2147/NDT.S130994<br>10.1016/j.brat.2015.10.005, 10.1016/j.invent.2016.06.007, 10.2196/13392, 10.1016/j.invent.2018.11.005                   | 2          | 2017          | Guided/Unguided  |                   | 10 RCT                                      | 274         | Module-based.                    | No                | 0                   |                              | 0                 |                       | 0                            |                              | 1                                         | rule-based                |
| Space from Depression   | 10.1016/j.jad.2020.12.104, 10.1111/eip.12540                                                                                                                      | 4          | 2020          | Guided           |                   | 8 RCT/LX                                    | 210         | Module-based                     | No                | 0                   |                              | 1                 | user choice           |                              | 0                            |                                           | 1 rule-based              |
| SPSRS                   | 10.1371/journal.pmed.1004025, 10.1136/ebmental-2021-300416, 10.1016/j.invent.2021.100380                                                                          | 2          | 2021          | Unguided         |                   | 5 RCT                                       | 38          | Youtube                          | No                | 0                   |                              | 0                 |                       | 0                            |                              | 1                                         | rule-based                |
| Step-By-Step            | 10.2196/27410                                                                                                                                                     | 4          | 2022          | Guided           |                   | 5-8 RCT                                     | 681         | Module-based                     | No                | 1                   |                              |                   | 0                     |                              | 1                            | rule-based                                | 1 user choice             |
| Super@                  | 10.1089/g4h.2014.0046                                                                                                                                             | 1          | 2021          | Guided           |                   | 14 Cost Effectiveness Study - RealWorldData | 229         | Module-based                     | No                | 1                   | user choice                  |                   | 0                     |                              | 1                            | rule-based                                | 0                         |
| SuperBetter             | 10.2196/mir.4861                                                                                                                                                  | 1          | 2015          | Unguided         |                   | 4 RCT                                       | 94          | Other                            | No                | 1                   | rule-based                   |                   | 0                     |                              | 0                            |                                           | 0                         |
| Taking Control          | 10.2196/mental.8510                                                                                                                                               | 1          | 2016          | Guided           |                   | 8 RCT                                       | 136         | Module-based                     | No                | 0                   |                              | 0                 |                       | 1                            | rule-based                   |                                           | 0                         |
| The Journal             | 10.1016/j.janxdis.2015.08.002                                                                                                                                     | 1          | 2018          | Blended          |                   | 12 RCT                                      | 35          | Module/Lesson based              | No                | 0                   |                              | 0                 |                       | 1                            | rule-based                   |                                           | 0                         |
| The Mood Course         | 10.1002/da.22590, 10.1016/j.invent.2017.05.001, 10.1002/acr.23257, 10.1016/j.jad.2015.02.026, 10.1016/j.jad.2014.08.038                                           | 1          | 2015          | Guided/Unguided  |                   | 8 RCT                                       | 141         | Module-based                     | No                | 0                   |                              | 0                 |                       | 1                            | provider choice              |                                           | 1 rule-based              |
| The Sadness Program     | 10.1016/j.brat.2019.103485, 10.4108/icst.pervasivehealth.2015.260115                                                                                              | 5          | 2022          | Guided           |                   | 6 RCT/Prepost Routine                       | 681         | Module-based                     | No                | 0                   |                              | 0                 |                       | 1                            | rule-based                   |                                           | 0                         |
| ThinkFeelDo             | 10.1037/ser000261, 10.2196/humanfactors.7951                                                                                                                      | 2          | 2019          | Guided           | 8/20              | RCT, PrePost                                | 145         | Lessons-based                    | No                | 0                   |                              | 0                 |                       | 1                            | rule-based                   |                                           | 1 user choice             |
| Thought Challenger      | 10.2196/14754, 10.7812/TPP/21.183                                                                                                                                 | 2          | 2019          | Guided           |                   | 6 RCT, Usability Study                      | 30          | Cognitive Restructuring Exercise | No                | 0                   |                              | 0                 |                       | 0                            |                              |                                           | 1 rule-based, user choice |
| Thrive                  | 10.3389/psyg.2021.668384                                                                                                                                          | 1          | 2022          | Unguided         |                   | 8 RCT                                       | 329         | Module-based.                    | No                | 1                   | user choice, rule-based      |                   | 0                     |                              | 0                            |                                           | 0                         |
| Thrive (Singapore)      | 10.2196/mir.9890                                                                                                                                                  | 1          | 2021          | Blended          |                   | 4 RCT                                       | 29          | Module-based                     | No                | 0                   |                              | 0                 |                       | 0                            |                              | 0                                         |                           |
| Unnamed_A               | 10.1186/s12888-017-1248-8                                                                                                                                         | 1          | 2018          | Blended          |                   | 10 Other                                    | 45          | Module-based                     | No                | 1                   | provider choice              |                   | 0                     |                              | 0                            |                                           | 0                         |
| Unnamed_B               | 10.1186/s12888-017-1248-8                                                                                                                                         | 1          | 2017          | Unguided         |                   | 5 RCT                                       | 326         | Single Exercise                  | No                | 0                   |                              | 0                 |                       | 0                            |                              | 0                                         |                           |
| Unnamed_C               | 10.1111/bjc.12287                                                                                                                                                 | 1          | 2017          | Unguided         |                   | 5 RCT                                       | 323         | Single Exercise                  | No                | 0                   |                              | 0                 |                       | 0                            |                              | 0                                         |                           |
| Unnamed_D               | 10.1177/2150132720971158                                                                                                                                          | 1          | 2021          | Blended          |                   | 2 RCT                                       | 25          | Other                            | No                | 0                   |                              | 0                 |                       | 0                            |                              | 0                                         |                           |
| Unnamed_E               | 10.1016/j.jad.2020.07.087                                                                                                                                         | 1          | 2020          | Blended          |                   | 8 RCT                                       | 11          | Other                            | No                | 0                   |                              | 0                 |                       | 0                            |                              | 0                                         |                           |
| Unnamed_F               | 10.1016/j.invent.2018.06.004                                                                                                                                      | 1          | 2020          | Unguided         |                   | RCT (program versions - Pre-Post)           | 206         | Other                            | No                | 0                   |                              | 0                 |                       | 0                            |                              | 0                                         |                           |
| Unnamed_G               | 10.1371/journal.pone.0126559                                                                                                                                      | 1          | 2018          | Unguided         |                   | 4 RCT                                       | 65          | Single Module.                   | No                | 0                   |                              | 0                 |                       | 0                            |                              | 0                                         |                           |
| Unnamed_H               |                                                                                                                                                                   | 1          | 2015          | Blended          |                   | 9 RCT                                       | 46          | Other                            | No                | 0                   |                              | 0                 |                       | 0                            |                              | 0                                         |                           |

| Meta Data |                                                                                                                                          |            |               |          |                   |            |             |                          |                   | Content Variability |                                          | Order Variability |                       | Guidance Variability |                         | Communication Variability |                       |
|-----------|------------------------------------------------------------------------------------------------------------------------------------------|------------|---------------|----------|-------------------|------------|-------------|--------------------------|-------------------|---------------------|------------------------------------------|-------------------|-----------------------|----------------------|-------------------------|---------------------------|-----------------------|
| Name      | Papers                                                                                                                                   | PaperCount | Year (newest) | Type     | Duration in weeks | Study Type | Sample Size | Content                  | Direct Comparison | Content variable    | Source of Variability                    | Order variable    | Source of Variability | Type variable        | Source of Variability   | Communication variable    | Source of Variability |
| Unnamed_I | 10.2196/JMIR.4861                                                                                                                        | 1          | 2016          | Guided   | 5                 | RCT        | 136         | Single Module ('session) | No                | 0                   |                                          | 0                 |                       | 1                    | rule-based              |                           | 0                     |
| Unnamed_J | 10.1016/j.jad.2017.03.018                                                                                                                | 1          | 2017          | Guided   | 12                | RCT        | 121         | Behavioural Act.         | No                | 0                   |                                          | 0                 |                       | 0                    |                         |                           | 0                     |
| Unnamed_K | 10.1016/j.jad.2017.03.018                                                                                                                | 1          | 2017          | Guided   | 12                | RCT        | 112         | Other                    | No                | 0                   |                                          | 0                 |                       | 0                    |                         |                           | 0                     |
| Unnamed_L | 10.1016/j.invent.2019.100247, 10.1016/j.invent.2019.100274, 10.1016/j.invent.2016.11.002, 10.1002/jclip.22753, 10.1007/s10943-017-0503-0 | 2          | 2019          | Guided   | 8                 | RCT        | 233         | Module-based.            | No                | 0                   |                                          | 0                 |                       | 1                    | rule-based              |                           | 0                     |
| Unnamed_M | 10.1192/bjp.bp.114.160101                                                                                                                | 1          | 2015          | Guided   | 12                | RCT        | 317         | Module-based             | No                | 1                   | rule based, user choice, provider choice | 0                 |                       | 1                    | rule-based, user choice |                           | 0                     |
| Unnamed_N | 10.2196/15312                                                                                                                            | 1          | 2020          | Unguided | 2                 | RCT        | 32          | Mindfulness              | No                | 1                   | user choice                              | 0                 |                       | 0                    |                         |                           | 0                     |
| Unnamed_O | 10.2196/15312                                                                                                                            | 1          | 2020          | Unguided | 2                 | RCT        | 37          | IBA                      | no                | 1                   | user choice                              | 0                 |                       | 0                    |                         |                           | 0                     |
| Unnamed_P | 10.2196/10698                                                                                                                            | 1          | 2018          | Guided   | 8                 | RCT        | 14          | Exercise                 | No                | 1                   | provider choice, rule based              | 0                 |                       | 0                    |                         |                           | 0                     |
| UTSMed    | 10.1016/j.jad.2016.05.045                                                                                                                | 1          | 2016          | Unguided | Unclear           | RCT        | 618         | website                  | No                | 0                   |                                          | 0                 |                       | 0                    |                         |                           | 0                     |
| WPAPP     | 10.9741/23736658.1044                                                                                                                    | 1          | 2016          | Unguided | 12                | RCT        | 18          | Other                    | No                | 1                   | rule based                               | 0                 |                       | 0                    |                         |                           | 0                     |
